# Supplementary material
Source: PubMed Central journal article supplement (PMC6707079)

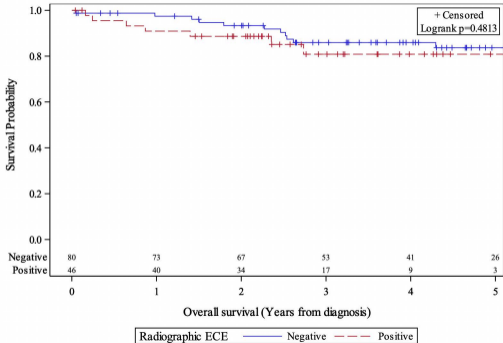

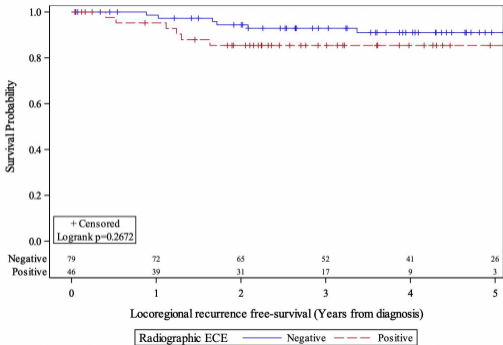

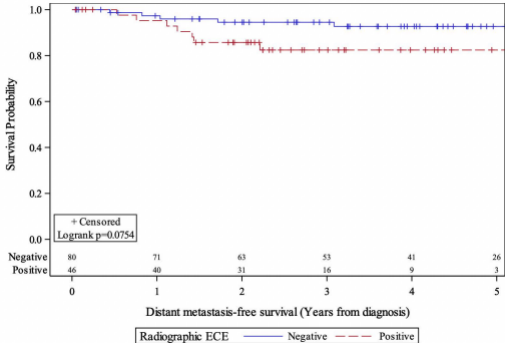

Supplement: NIHMS1025650-supplement-Supp_FigS1-3.pdf [file NIHMS1025650-supplement-Supp_FigS1-3.pdf]
